# Supplementary material for: Glycosyltransferase engineering and multi-glycosylation routes development facilitating synthesis of high-intensity sweetener mogrosides
Source: PubMed Central journal article supplement — iScience. 2022 Sep 27;25(10):105222. doi: 10.1016/j.isci.2022.105222 (PMC9557039; doi:10.1016/j.isci.2022.105222), 2022-09-27
Supplement: mmc1.pdf [file mmc1.pdf]

iScience, Volume 25

## **Supplemental information**

### **Glycosyltransferase engineering and multi-glycosylation routes development facilitating synthesis of high-intensity sweetener mogrosides**

**Jiao Li, Shicheng Mu, Jiangang Yang, Cui Liu, Yanfei Zhang, Peng Chen, Yan Zeng, Yueming Zhu, and Yuanxia Sun**

1 Supporting information

2 **Glycosyltransferases engineering and multi-glycosylation routes development**  
3 **facilitating biosynthesis of high-intensity sweetener mogrosides**

4 *Jiao Li<sup>1,2‡</sup>, Shicheng Mu<sup>1‡</sup>, Jiangang Yang<sup>1\*</sup>, Cui Liu<sup>1</sup>, Yanfei Zhang<sup>1</sup>, Peng Chen<sup>1</sup>,*  
5 *Yan Zeng<sup>1</sup>, Yueming Zhu<sup>1</sup>, and Yuanxia Sun<sup>1,2,3\*</sup>*

6 <sup>1</sup> National Engineering Laboratory for Industrial Enzymes, Tianjin Institute of  
7 Industrial Biotechnology, Chinese Academy of Sciences, 32 Xi Qi Dao, Tianjin  
8 Airport Economic Area, Tianjin 300308, China

9 <sup>2</sup> National Technology Innovation Center of Synthetic Biology, Tianjin 300308,  
10 China

11 <sup>3</sup> Lead contact

12 ‡ These authors contributed equally to this work

13 \* Correspondence: sun\_yx@tib.cas.cn; yang\_jg1@tib.cas.cn; Tel.: +862284861960

14

## 15 Content

|    |                                                                                               |    |
|----|-----------------------------------------------------------------------------------------------|----|
| 16 | 1. Supporting tables.....                                                                     | 1  |
| 17 | <b>Table S1.</b> Kinetic parameters of glycosyltransferases towards mogrosides. ....          | 1  |
| 18 | <b>Table S2.</b> Enzymatic activity and product composition for MS1 and mutant M7 under       |    |
| 19 | different mogroside substrates.....                                                           | 1  |
| 20 | <b>Table S3.</b> Kinetic parameters of glycosyltransferase MG1 towards mogrol. ....           | 1  |
| 21 | <b>Table S4.</b> Primers used in this study.....                                              | 1  |
| 22 | <b>Table S5.</b> Strains and plasmids used in this study. ....                                | 3  |
| 23 | <b>Table S6.</b> <sup>13</sup> C and <sup>1</sup> H NMR data for <b>VI</b> (600 MHz). ....    | 4  |
| 24 | 2. Supporting figures .....                                                                   | 7  |
| 25 | <b>Figure S1.</b> SDS-PAGE of recombinant protein purification fractions. ....                | 7  |
| 26 | <b>Figure S2.</b> HPLC and MS analysis of MG1 enzymatic reaction products using mogrol as     |    |
| 27 | substrate.....                                                                                | 8  |
| 28 | <b>Figure S3.</b> HPLC analysis of UGT72-269-1 and UGT94-289-3 enzymatic reaction             |    |
| 29 | products using mogrosides as substrates. ....                                                 | 9  |
| 30 | <b>Figure S4.</b> Glycosylations catalyzed by enzymes MS1 and MS2 using various substrates.   |    |
| 31 | .....                                                                                         | 10 |
| 32 | <b>Figure S5.</b> MS analysis of MS1 and MS2 enzymatic reaction products using mogrosides as  |    |
| 33 | substrates. ....                                                                              | 11 |
| 34 | <b>Figure S6.</b> Multiple sequence alignment of 9 UGTs that show branched glycosylation      |    |
| 35 | activity to triterpenes. ....                                                                 | 12 |
| 36 | <b>Figure S7.</b> Determination of kinetic parameters for recombinant glycosyltransferase MG1 |    |
| 37 | (on IE) and MS1 and MS2 (on mogroside IIE). ....                                              | 13 |
| 38 | <b>Figure S9.</b> HPLC analysis of MS1 WT and mutant M7 enzymatic reaction products using     |    |
| 39 | mogroside IIE as substrate.....                                                               | 15 |
| 40 | <b>Figure S10.</b> HPLC analysis of MS1 WT and mutant M7 enzymatic reaction products using    |    |
| 41 | mogroside IIIA as substrate.....                                                              | 16 |
| 42 | <b>Figure S11.</b> HPLC analysis of MS1 WT and mutant M7 enzymatic reaction products using    |    |
| 43 | mogroside IIIIE as substrate. ....                                                            | 17 |
| 44 | <b>Figure S12.</b> HPLC analysis of MS1 WT and mutant M7 enzymatic reaction products using    |    |
| 45 | mogroside IVA as substrate.....                                                               | 18 |
| 46 | <b>Figure S13.</b> HPLC analysis of MS1 WT and mutant M7 enzymatic reaction products using    |    |
| 47 | mogroside IVE as substrate. ....                                                              | 19 |

|    |                                                                                                                               |    |
|----|-------------------------------------------------------------------------------------------------------------------------------|----|
| 48 | <b>Figure S14.</b> HPLC analysis of MS1 WT and mutant M7 enzymatic reaction products using mogroside Sia I as substrate. .... | 20 |
| 49 |                                                                                                                               |    |
| 50 | <b>Figure S15.</b> HPLC analysis of MS1 WT and mutant M7 enzymatic reaction products using mogroside V as substrate. ....     | 21 |
| 51 |                                                                                                                               |    |
| 52 | <b>Figure S16.</b> Conformation maps of M7-IIE and WT-IIE complexes during the 3*50 ns MD simulations. ....                   | 22 |
| 53 |                                                                                                                               |    |
| 54 | <b>Figure S17.</b> Optimization of reaction temperature, pH and divalent metal ions of MS1 and MS2. ....                      | 23 |
| 55 |                                                                                                                               |    |
| 56 | <b>Figure S18.</b> <sup>1</sup> H NMR spectrum of VI in Dimethyl sulfoxide-d <sub>6</sub> (600 MHz). ....                     | 24 |
| 57 | <b>Figure S19.</b> <sup>13</sup> C NMR spectrum of VI in Dimethyl sulfoxide-d <sub>6</sub> (600 MHz). ....                    | 25 |
| 58 | <b>Figure S20.</b> HMBC spectrum of VI in Dimethyl sulfoxide-d <sub>6</sub> (600 MHz) ....                                    | 26 |
| 59 | <b>Figure S21.</b> HSQC spectrum of VI in Dimethyl sulfoxide-d <sub>6</sub> (600 MHz). ....                                   | 27 |
| 60 | <b>Figure S22.</b> COSY spectrum of VI in Dimethyl sulfoxide-d <sub>6</sub> (600 MHz) ....                                    | 28 |
| 61 | <b>Figure S23.</b> TOCSY spectrum of VI in Dimethyl sulfoxide-d <sub>6</sub> (600 MHz). ....                                  | 29 |
| 62 | <b>Figure S24.</b> The gene sequences of MG1 and MS1 ....                                                                     | 30 |
| 63 |                                                                                                                               |    |

64

65 **1. Supporting tables**

66 **Table S1.** Kinetic parameters of glycosyltransferases towards mogrosides. **Related to**  
67 **Table1.**

| Substrate | Enzyme | $K_m$ ( $\mu\text{M}$ ) | $k_{cat}$ ( $\text{s}^{-1}$ ) | $k_{cat}/K_m$ ( $\text{mM}^{-1}\cdot\text{s}^{-1}$ ) |
|-----------|--------|-------------------------|-------------------------------|------------------------------------------------------|
| IIE       | MS1    | $34.31 \pm 0.5$         | $0.014 \pm 0.002$             | $0.41 \pm 0.01$                                      |
|           | MS2    | $193.20 \pm 3.2$        | $0.026 \pm 0.002$             | $0.14 \pm 0.006$                                     |

68

69 **Table S2.** Enzymatic activity and product composition for MS1 and mutant M7 under  
70 different mogroside substrates. **Related to Figure 5.** To detect the product types and  
71 composition glycosylated by MS1 and its mutants, the glycosylation processes were  
72 controlled, in which 10-100  $\mu\text{g}$  of the purified enzyme at 40°C for 15-30 min  
73 (depending on the activity of mutants) and one glucose residue was transferred to  
74 substrates.

| Substrates                    | III E          |       |        |      |
|-------------------------------|----------------|-------|--------|------|
| Product types and composition | Conversion (%) |       | mU/mg  | fold |
|                               | III A          | III E |        |      |
| WT                            | 20             | 0     | 0.0085 | 1    |
| M7                            | 30             | 0     | 2.97   | 351  |

| Substrates                    | III A          |      |        |      |
|-------------------------------|----------------|------|--------|------|
| Product types and composition | Conversion (%) |      | mU/mg  | fold |
|                               | IV A           | IV X |        |      |
| WT                            | 18             | 0    | 0.0074 | 1    |
| M7                            | 26             | 9    | 1.91   | 259  |

| Substrates                    | III E          |       |        |      |
|-------------------------------|----------------|-------|--------|------|
| Product types and composition | Conversion (%) |       | mU/mg  | fold |
|                               | IV E           | Sia I |        |      |
| WT                            | 6              | 17    | 0.0096 | 1    |
| M7                            | 3              | 32    | 3.09   | 322  |

| Substrates                    | IV A           |  |       |      |
|-------------------------------|----------------|--|-------|------|
| Product types and composition | Conversion (%) |  | mU/mg | fold |
|                               | VA             |  |       |      |
| WT                            | -              |  | 0     | -    |
| M7                            | 25             |  | 1.25  | -    |

| Substrates                    | IV E           |    |        |      |
|-------------------------------|----------------|----|--------|------|
| Product types and composition | Conversion (%) |    | mU/mg  | fold |
|                               | V              | VE |        |      |
| WT                            | 18             | -  | 0.0072 | 1    |
| M7                            | 1              | 36 | 2.72   | 378  |

| Substrates                    | Sia I          |  |       |      |
|-------------------------------|----------------|--|-------|------|
| Product types and composition | Conversion (%) |  | mU/mg | fold |

|    | V  | VX |        |     |
|----|----|----|--------|-----|
| WT | 15 | -  | 0.0075 | 1   |
| M7 | 14 | 11 | 1.04   | 139 |

| Substrates                    | V              |       |      |
|-------------------------------|----------------|-------|------|
| Product types and composition | Conversion (%) |       |      |
|                               | VI             | mU/mg | fold |
| WT                            | -              | 0     | -    |
| M7                            | 27             | 1.08  | -    |

75

76 **Table S3.** Kinetic parameters of glycosyltransferase MG1 towards mogrol. **Related to**

77 **Table1.**

| Substrate | Enzyme | $K_m$ ( $\mu\text{M}$ ) | $k_{cat}$ ( $\text{s}^{-1}$ ) | $k_{cat}/K_m$ ( $\text{mM}^{-1}\cdot\text{s}^{-1}$ ) |
|-----------|--------|-------------------------|-------------------------------|------------------------------------------------------|
| Mogrol    | MG1    | $10.10 \pm 0.3$         | $0.86 \pm 0.04$               | $86.00 \pm 6.6$                                      |
| IE        | MG1    | $61.27 \pm 0.7$         | $0.04 \pm 0.005$              | $0.63 \pm 0.04$                                      |

78



79 **Table S4.** Primers used in this study. **Related to STAR Methods.**

| Primer name | Sequence (5' to 3')                       |
|-------------|-------------------------------------------|
| MS1-F       | GGTACCGACGACGACGACAAGATGGATGCTGCCCAACAAG  |
| MS1-R       | CAGTGGTGGTGGTGGTGGTGCATATTTTAAGCAAGAGAG   |
| T11H-F      | TGACACCACACATATTTTGATGCTTCCATGGCTCGGCTA   |
| T11H-R      | GCATCAAAATATGTGTGGTGTACCTTGTGGGCAGCAT     |
| L13V-F      | CACAACCATTGTGATGCTTCCATGGCTCGGCTATGGCCA   |
| L13V-R      | ATGGAAGCATCACAATGGTTGTGGTGTACCTTGTGGG     |
| P16A-F      | TTTGATGCTTGCCTGGCTCGGCTATGGCCATCTTTCAGC   |
| P16A-R      | AGCCGAGCCACGCAAGCATCAAAATGGTTGTGGTGTAC    |
| W17A-F      | GATGCTTCCAGCGCTCGGCTATGGCCATCTTTCAGCTTT   |
| W17A-R      | CATAGCCGAGCGCTGGAAGCATCAAAATGGTTGTGGTGT   |
| L18A-F      | GCTTCCATGGGCGGGCTATGGCCATCTTTCAGCTTTTCT   |
| L18A-R      | GGCCATAGCCCGCCCATGGAAGCATCAAAATGGTTGTGG   |
| G19A-F      | TCCATGGCTCGCGTATGGCCATCTTTCAGCTTTTCTCGA   |
| G19A-R      | GATGGCCATACGCGAGCCATGGAAGCATCAAAATGGTTG   |
| Y20A-F      | ATGGCTCGGCGCGGGCCATCTTTCAGCTTTTCTCGAGCT   |
| Y20A-R      | AAAGATGGCCCGCGCCGAGCCATGGAAGCATCAAAATGG   |
| G21A-F      | GCTCGGCTATGCGCATCTTTCAGCTTTTCTCGAGCTGGC   |
| G21A-R      | CTGAAAGATGCGCATAGCCGAGCCATGGAAGCATCAAAA   |
| L23A-F      | CTATGGCCATGCGTCAGCTTTTCTCGAGCTGGCCAAAAG   |
| L23A-R      | GAAAAGCTGACGCATGGCCATAGCCGAGCCATGGAAGCA   |
| S24A-F      | TGGCCATCTTGCCTGGCTTTTCTCGAGCTGGCCAAAAGCCT |
| S24A-R      | CGAGAAAAGCCGCAAGATGGCCATAGCCGAGCCATGGAA   |
| A25P-F      | CCATCTTTCACCGTTTCTCGAGCTGGCCAAAAGCCTCTC   |
| A25P-R      | GCTCGAGAAACGGTGAAAGATGGCCATAGCCGAGCCATG   |
| F26A-F      | TCTTTCAGCTGCGCTCGAGCTGGCCAAAAGCCTCTCAAG   |
| F26A-R      | CCAGCTCGAGCGCAGCTGAAAGATGGCCATAGCCGAGCC   |
| S34A-F      | CAAAAGCCTCGCGAGGAGGAACTTCCATATCTACTTCTG   |
| S34A-R      | AGTTCCTCCTCGCGAGGCTTTTGGCCAGCTCGAGAAAAG   |
| N37G-F      | CTCAAGGAGGGGCTTCCATATCTACTTCTGTTCAACCTC   |
| N37G-R      | AGATATGGAAGCCCTCCTTGAGAGGCTTTTGGCCAGCT    |
| F38H-F      | AAGGAGGAACCATCATATCTACTTCTGTTCAACCTCTGT   |
| F38H-R      | AGTAGATATGATGGTTCCTCCTTGAGAGGCTTTTGGCCA   |
| I40V-F      | GAACTTCCATGTGTACTTCTGTTCAACCTCTGTTAATCT   |
| I40V-R      | AACAGAAGTACACATGGAAGTTCCTCCTTGAGAGGCTTT   |
| S46P-F      | CTGTTCAACCCCGTTAATCTTGACGCCATTAACCAAAA    |
| S46P-R      | CAAGATTAACCGGGGTTGAACAGAAGTACACATGGAAGT   |
| D62P-F      | TTCTTTCTCTCCGTCCATTCAATTTGTGGAGCTCCATCT   |
| D62P-R      | ATTGAATGGACGGAGAGAAAGAAGAAGGAAGCTTTGGTT   |
| F77L-F      | TTCTCCTGAGCTGCCTCCTCATCTTACACAACCAACGG    |
| F77L-R      | GATGAGGAGGCAGCTCAGGAGAAGAAGGGAGATGGAGCT   |
| H82E-F      | TCCTCATCTTGAAACAACCAACGGCCTTCCCCCTACCCT   |

|         |                                           |
|---------|-------------------------------------------|
| H82E-R  | CGTTGGTTGTTTCAAGATGAGGAGGGAACTCAGGAGAAG   |
| A102L-F | CTTCTCCATGCTGGCCCAGCACTTTGAGTCCATTTTACA   |
| A102L-R | AGTGCTGGGCCAGCATGGAGAAGGCTTGGTGGAGAGCGG   |
| E107S-F | CCAGCACTTTAGCTCCATTTTACAAACACTTGCCCCGCA   |
| E107S-R | GTAAAATGGAGCTAAAGTGCTGGGCAGCCATGGAGAAGG   |
| S108E-F | GCACTTTGAGGAAATTTTACAAACACTTGCCCCGCACCT   |
| S108E-R | TTTGTA AAAATTTCTCAAAGTGCTGGGCAGCCATGGAGA  |
| H116D-F | ACTTGCCCCGGATCTTCTCATTTATGACTCTCTTCAACC   |
| H116D-R | AAATGAGAAGATCCGGGGCAAGTGTTTGTA AAAATGGACT |
| I139V-F | AATCCGGCCGTGA ACTTCAATACTACGGGAGTTTTTCGT  |
| I139V-R | TATTGAAGTTCACGGCCGGAATTTTGAGGGATGAAGCTA   |
| N142L-F | CATCAACTTCCTGACTACGGGAGTTTTTCGTCATTTCTCA  |
| N142L-R | CTCCCGTAGTCAGGAAGTTGATGGCCGGAATTTTGAGGG   |
| V146A-F | TACTACGGGAGCGTTCGTCATTTCTCAAGGGCTTCACCC   |
| V146A-R | AAATGACGAACGCTCCCGTAGTATTGAAGTTGATGGCCG   |
| N354A-F | CTGTGGATGGGCGTCCGGTGATGGAGAGCATGATGTTTGG  |
| N354A-R | CCATCACCGACGCCCATCCACAGTGGCTCACGAATCCCC   |

---

81 **Table S5.** Strains and plasmids used in this study. **Related to STAR Methods.**

| Strains and plasmids | description                                                                                       | Ref.       |
|----------------------|---------------------------------------------------------------------------------------------------|------------|
| <b>plasmids</b>      |                                                                                                   |            |
| pET32a (+)           | pBR322 ori with P <sub>T7</sub> ; Amp <sup>R</sup>                                                | Novagen    |
| pET32a-MG1           | pET32 carrying MG1                                                                                | This study |
| pET32a-MS1           | pET32 carrying MS1                                                                                | This study |
| pET32a-MS2           | pET32 carrying MS2                                                                                | This study |
| pYZ291               | 2MICRON, URA3                                                                                     | Novagen    |
| pYZ291-MS1           | TEF1p-MG1-CYC1t                                                                                   | This study |
| pYZ291-MS1-MS1       | GPD1p-MS1-adh1t-TEF1p-MS1-CYC1t                                                                   | This study |
| pYZ291-MS1-MG1       | GPD1p-MS1-adh1t-TEF1p-MG1-CYC1t                                                                   | This study |
| <b>Strains</b>       |                                                                                                   |            |
| CEN.PK2-1C           | Saccharomyces cerevisiae strain CEN.PK2-1C (MATaleu2-3, 112 ura3-52 trp1-289 his3-Δ1 MAL2-8cSUC2) | Novagen    |
| Mog1                 | CEN.PK2-1C containing pYZ291-MS1                                                                  | This study |
| Mog2                 | CEN.PK2-1C containing pYZ291-MS1, with gene Exg1 deleted                                          | This study |
| Mog3                 | CEN.PK2-1C containing pYZ291-MS1-MS1, with gene Exg1 deleted                                      | This study |
| Mog4                 | CEN.PK2-1C containing pYZ291-MS1-MG1, with gene Exg1 deleted                                      | This study |

82

83 **Table S6.**  $^{13}\text{C}$  and  $^1\text{H}$  NMR data for **VI** (600 MHz). Related to Figure 5.

| C             | $\delta^{13}\text{C}$ | $\delta^1\text{H}$                                               |
|---------------|-----------------------|------------------------------------------------------------------|
| 1             | 27.2                  | $\text{CH}_2$ , 1.49(m), 2.24(m)                                 |
| 2             | 29.3                  | $\text{CH}_2$ , 1.91(m)                                          |
| 3             | 88.6                  | CH, 3.49(br, s)                                                  |
| 4             | 42.9                  |                                                                  |
| 5             | 144.7                 |                                                                  |
| 6             | 119.9                 | CH, 5.47(d, J=5.4Hz)                                             |
| 7             | 25.2                  | $\text{CH}_2$ , 1.79(m), 2.44(m)                                 |
| 8             | 44.7                  | CH, 1.67(m)                                                      |
| 9             | 41.0                  |                                                                  |
| 10            | 37.1                  | CH, 2.50(d, J=12.4Hz)                                            |
| 11            | 79.6                  | CH, 3.85(m)                                                      |
| 12            | 41.2                  | $\text{CH}_2$ , 1.81(m)                                          |
| 13            | 48.5                  |                                                                  |
| 14            | 50.4                  |                                                                  |
| 15            | 35.4                  | $\text{CH}_2$ , 1.14(m), 1.21(m)                                 |
| 16            | 29.5                  | $\text{CH}_2$ , 1.32(m), 1.96(m)                                 |
| 17            | 51.9                  | CH, 1.62(dd)                                                     |
| 18            | 17.3                  | $\text{CH}_3$ , 0.92(s)                                          |
| 19            | 26.3                  | $\text{CH}_3$ , 1.15(s)                                          |
| 20            | 37.5                  | CH, 1.50(m)                                                      |
| 21            | 19.3                  | $\text{CH}_3$ , 0.97(d)                                          |
| 22            | 34.1                  | $\text{CH}_2$ , 1.48(m), 1.56(m)                                 |
| 23            | 29.9                  | $\text{CH}_2$ , 1.40(m), 1.55(m)                                 |
| 24            | 93.2                  | CH, 3.40(m)                                                      |
| 25            | 73.8                  |                                                                  |
| 26            | 26.8                  | $\text{CH}_3$ , 1.12(s)                                          |
| 27            | 24.2                  | $\text{CH}_3$ , 1.15(s)                                          |
| 28            | 28.1                  | $\text{CH}_3$ , 1.07(s)                                          |
| 29            | 26.6                  | $\text{CH}_3$ , 1.21(s)                                          |
| 30            | 20.0                  | $\text{CH}_3$ , 0.89(s)                                          |
| 3-O-Glc-1     |                       |                                                                  |
| C-1           | 104.8                 | CH, 4.40(d, J=7.80Hz)                                            |
| C-2           | 80.2                  | CH, 3.63(m)                                                      |
| C-3           | 78.2                  | CH, 3.54(m)                                                      |
| C-4           | 71.6                  | CH, 3.19(m)                                                      |
| C-5           | 77.1                  | CH, 3.44(m)                                                      |
| C-6           | 69.8                  | $\text{CH}_2$ , 3.80(dd, J1=5.8Hz, J2=11.4Hz), 4.06(d, J=11.4Hz) |
| 3-O-Glc-2-Glc |                       |                                                                  |
| C-1           | 104.0                 | CH, 4.67(d, J=7.80Hz)                                            |
| C-2           | 77.9                  | CH, 3.25(m)                                                      |
| C-3           | 78.6                  | CH, 3.63(m)                                                      |

|                 |       |                                                                    |
|-----------------|-------|--------------------------------------------------------------------|
| C-4             | 71.8  | CH, 3.29(m)                                                        |
| C-5             | 75.7  | CH, 3.27(m)                                                        |
| C-6             | 63.1  | CH <sub>2</sub> , 3.67(dd), 3.85(d)                                |
| 3-O-Glc-6-Glc   |       |                                                                    |
| C-1             | 104.8 | CH, 4.42(d, J=7.80Hz)                                              |
| C-2             | 77.9  | CH, 3.19(m)                                                        |
| C-3             | 78.1  | CH, 3.28(m)                                                        |
| C-4             | 71.6  | CH, 3.32(m)                                                        |
| C-5             | 72.4  | CH, 3.22(m)                                                        |
| C-6             | 62.7  | CH <sub>2</sub> , 3.67(dd), 3.85(d)                                |
| 24-O-Glc-1      |       |                                                                    |
| C-1             | 104.1 | CH, 4.44(d, J=7.80Hz)                                              |
| C-2             | 81.3  | CH, 3.61(m)                                                        |
| C-3             | 78.0  | CH, 3.37(m)                                                        |
| C-4             | 71.7  | CH, 3.27(m)                                                        |
| C-5             | 76.5  | CH, 3.51(m)                                                        |
| C-6             | 70.2  | CH <sub>2</sub> , 3.63(dd, J1=5.8Hz, J2=11.4Hz), 4.24(d, J=11.4Hz) |
| 24-O-1Glc-2-Glc |       |                                                                    |
| C-1             | 104.6 | CH, 4.77(d, J=7.80Hz)                                              |
| C-2             | 78.3  | CH, 3.28(m)                                                        |
| C-3             | 77.7  | CH, 3.37(m)                                                        |
| C-4             | 75.2  | CH, 3.20(m)                                                        |
| C-5             | 78.0  | CH, 3.26(m)                                                        |
| C-6             | 63.6  | CH <sub>2</sub> , 3.64(dd), 3.87(d)                                |
| 24-O-1Glc-6-Glc |       |                                                                    |
| C-1             | 104.4 | CH, 4.29(d, J=7.80Hz)                                              |
| C-2             | 75.2  | CH, 3.23(m)                                                        |
| C-3             | 77.7  | CH, 3.36(m)                                                        |
| C-4             | 71.5  | CH, 3.27(m)                                                        |
| C-5             | 76.2  | CH, 3.26(m)                                                        |
| C-6             | 62.8  | CH <sub>2</sub> , 3.67(dd), 3.85(d)                                |

---



86 **2. Supporting figures**

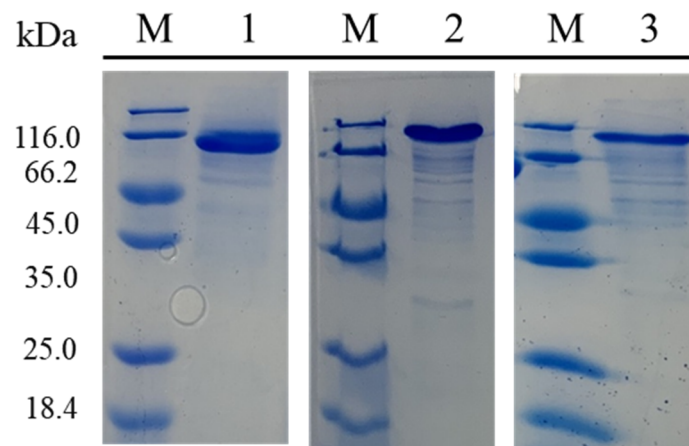

87

88 **Figure S1.** SDS-PAGE of recombinant protein purification fractions. **Related to Figures**

89 **2 and 3.** Lane M: protein marker; lane 1: purified MG1 (54 kDa); lane 2: MS1 (72 kDa);

90 lane 3: MS2 (71 kDa).

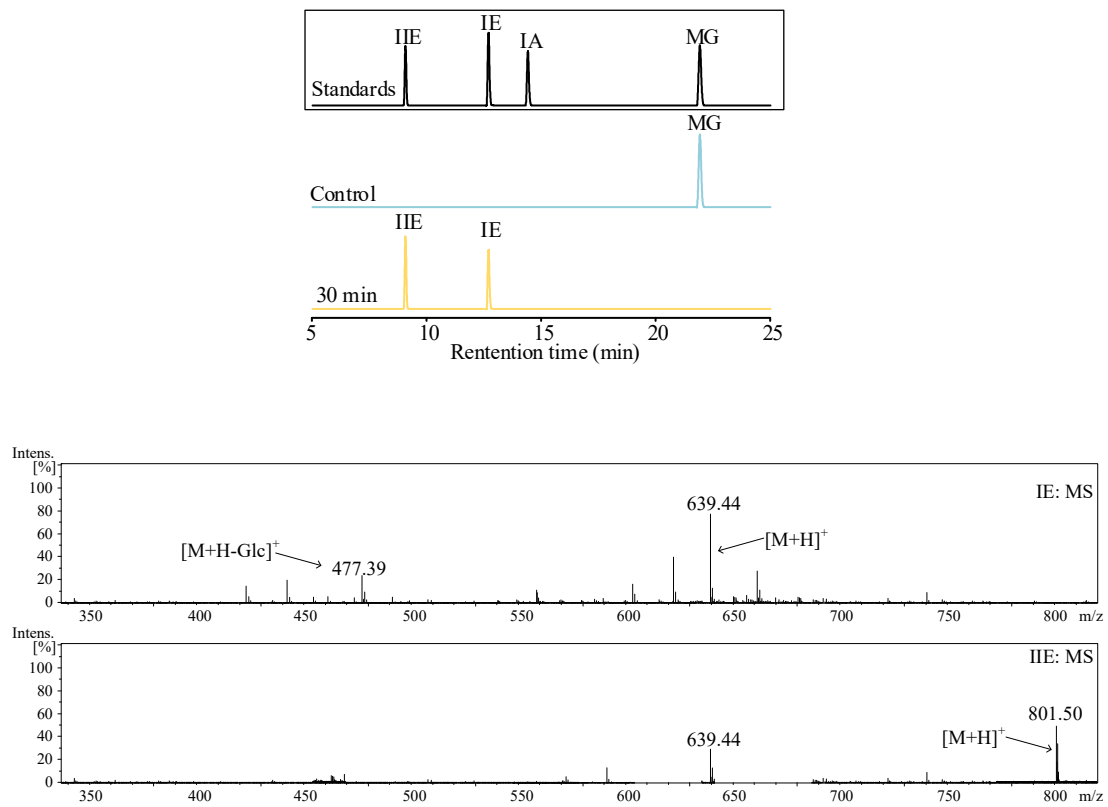

91

92 **Figure S2.** HPLC and MS analysis of MG1 enzymatic reaction products using mogrol

93 as substrate. **Related to Figure 2.**



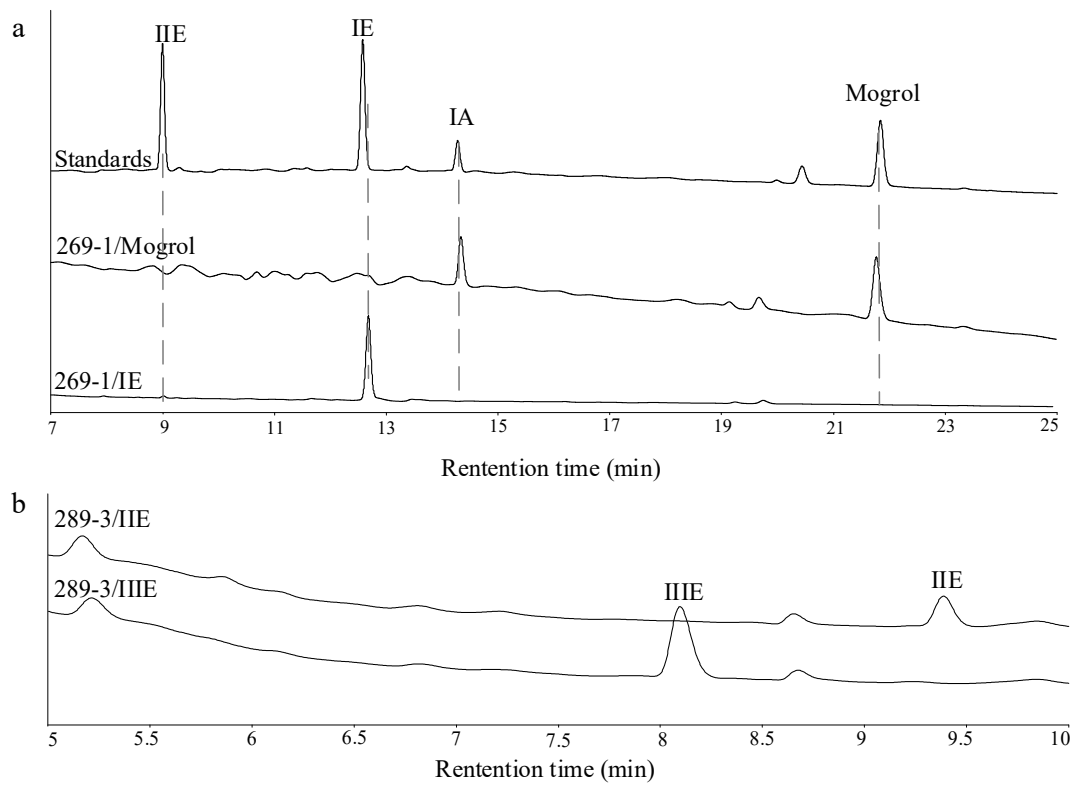

94

95 **Figure S3.** HPLC analysis of UGT72-269-1 and UGT94-289-3 enzymatic reaction  
 96 products using mogrosides as substrates. Related to Figure 3.

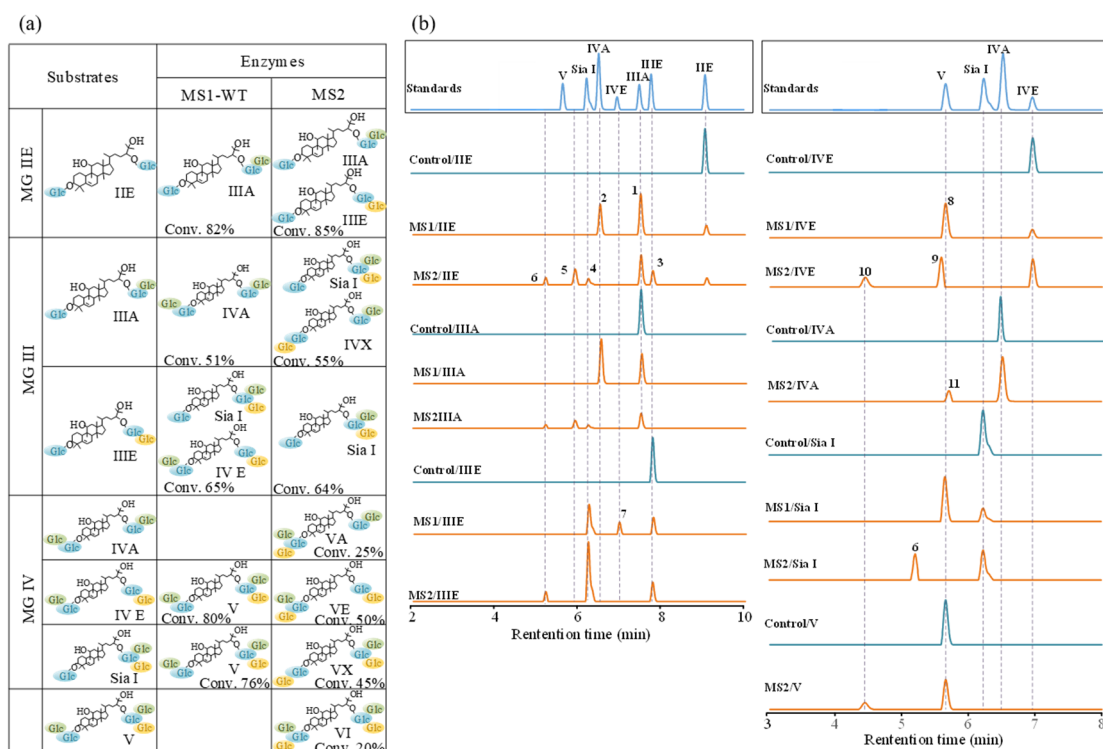

98

99 **Figure S4.** Glycosylations catalyzed by enzymes MS1 and MS2 using various  
 100 substrates. **Related to Figure 5.** (a) Schematic summary of glycosylations by enzymes  
 101 MS1 and MS2 using various substrates. (b) HPLC analysis of MS1 and MS2 enzymatic  
 102 reaction products using mogrosides as substrates. The HPLC methods as follow:  
 103 Mobile phase A was ddH<sub>2</sub>O with 0.1% formic acid, and mobile phase B contained  
 104 CH<sub>3</sub>CN and 0.1% formic acid. The gradient are as follows: 0-25 min, 25%-80% pump  
 105 B for mogrol, mogroside IE, mogroside IIE, and mogroside III; 0-25 min, 25%-55%  
 106 pump B for mogroside IV, V, and VI, and the flow rate was 1 mL/min.

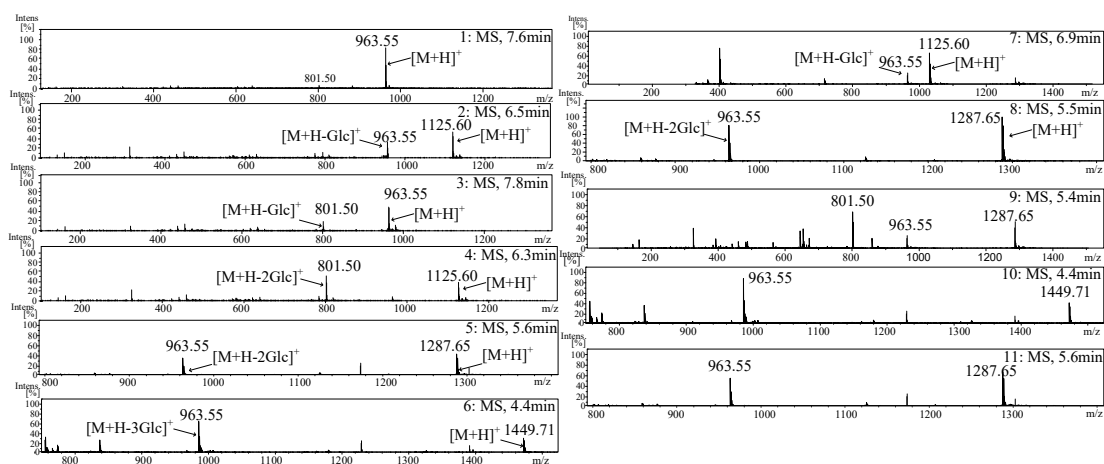

107

108 **Figure S5.** MS analysis of MS1 and MS2 enzymatic reaction products using  
 109 mogrosides as substrates. **Related to Figure 5.** Flight-high-resolution electrospray  
 110 ionization-mass spectrometry (ESI-MS) parameters were as follows: the scan range was  
 111 100–1,500 m/z in positive ion mode, spray voltage was 4,500 V, capillary temperature  
 112 was 400°C, dry gas was 6 ml/min, dry temperature was 180°C and nebulizer pressure  
 113 was 1 bar.

|           |                                                                                                                                                  |     |
|-----------|--------------------------------------------------------------------------------------------------------------------------------------------------|-----|
| MS1       | ... MDAQQ... GETTTI LMLPLWYGYGLS AFLELAKSLSRRNFHI YFCSTSVNLDAI KP KLP... SSFSDSI QFVELHLPLSSPEEPHHLHTT NGLPPTL                                   | 91  |
| MS2       | ... MDSGYSSS YAAAAGHVVI CPWAF GELLPCLDLQRLASRGHRVSVSTPRNI SRLPPVR... PALAPLVAFAVLP LPRVEGLDGAETNDVPHDR                                           | 95  |
| UGT91D2   | ... NATSDSI VDDRK QLVHATFPWAFGHILPYLQSKLIEKGHKVFLSTTRNI QRLS... SHI SPLI NVVQLTLP RVELEDAEATTDVHPED                                              | 91  |
| UGT73P12  | MDSFVGEVGDHQADTTVLKAVFLPFI SKSLEL RVVDKARI FAVHGVDVTI I TTPANA AAFQTSI DHDSSRSRSI KTHI WPPFPQVPLQOGFERL DADTPOH                                  | 100 |
| Ole_D     | ... MTQTTP... AHI AMFSI AAHG VNP SLEVI RELVARGHRTYAI PPFVADKVA... ATGPRPVLVHSTLPGPDADAEAWGSLLDNRRRT                                              | 84  |
| UGT91G16  | ... NAASASRP... LHLVI CPWAF GELLPCLEL AHRLASRGHRVSVSTPRNI SRLPPLR... PAVAPLVNFAVLP LAQVPLDGAETNDVGDGK                                            | 89  |
| HV1       | ... MDGNSSS... PLBVI CPWAL GELLPCLDI AERLASRGHRVSVSTPRNI ARLPPLR... PAVAPLVDFVAVLP LPHVDGLDGAETNDVGYDK                                           | 90  |
| Pn3-31    | ... MDI EK... GRI SI ALLPFLAHGHISPFLELAKLAKRRNCNIFLCSTPI NLSSI KNRVSD... KDSASIKLVELHLPLSSPEEPHHTT NGLPSHL                                       | 96  |
| Pn3-32    | ... MDNQK... GRI SI ALLPFLAHGHISPFLELAKLAKRRNCNIFLCSTPI NLSSI KN... KDSASV KLV EHLPLSSPEEPHHTT NGLPSHL                                           | 90  |
| Consensus | ... h p                                                                                                                                          |     |
| MS1       | ... MPALHQAFA SAAQHEFESI C T L A P H... LLI YFSLQWVPRVSSSLKI PAI NFNTTGVFVI SQG... LHPI HYPHSKFFPSEFV                                            | 169 |
| MS2       | PDMVELHRRAFDGLAAPSEFIFGTACAD... WVI VVVFHWA AALAEHKVPCAMLLGS AHMI ASI... ADDRLEAETESPAAGGRR AAAP                                                 | 184 |
| UGT91D2   | ... I PYLKKASDGLQEVTRFLEQHS PD... WI IYTYHYMLPSI AASLGI SRAHFSVTTWAI AYGPSADAMI NGSDRRTTVE LDTTPKWF PF                                           | 181 |
| UGT73P12  | ... LLPKI YQGLSI LQEQQQLREMRPD... FI VITMYPSPVDA AELGI PRLVNCNGS YFAQSAVN... SI ELFSQAKVDSNTETFTLLPGL                                            | 186 |
| Ole_D     | ... FLNDAI QALPQADAYADDI P. D... LVLHDI TSYPARVLRVGVPAVLSPLNVAWKGYE... SIELSPQAKVDSNTETFTLLPGL                                                   | 144 |
| UGT91G16  | ... AELRLRASDGLAEPSEFIRAACKP... DWLI VDI VNNWAAA AAEHKVPCVLLQCAARVFTPL... AGP... VSEHAAA AVGKERPAEAP                                             | 155 |
| HV1       | ... FELHKAFDGLAEPSEFIRAACAEAGGSRPDWLI VTFHFWAAA AVENKVPVCLLLGAATVI AGF... ARG... VSEHAAA AVGKERPAEAP                                             | 180 |
| Pn3-31    | ... MVLKNAFETVGTTFSEI LKTLDPD... LLI YEFNPSWAPEI ALSHNI PAVYFLTSAATSSVA... LRALKNPGEKYPFPDFY                                                     | 168 |
| Pn3-32    | ... MVLKNAFETVGTTFSEI LKTLNDP... LLI YEFNPSWAPEI ASSHNI PAVYFLTSAATSSSI G... LHAFKNPGEKYPFPDFY                                                   | 164 |
| Consensus | ... d a                                                                                                                                          |     |
| MS1       | LHNHWKAMYSTADGAS. TERTKRGEAFLYLCHASCSVI LINSFRELE GKMYDLYSVLL... NKKVVPVGLVYEP... NQDGEDEGYSI KNWLD                                              | 258 |
| MS2       | TFEVARMKLI RTKG... SSGMSLAERFSLT LRSLSLVVGRSCVEFPETVP L LSTLR... GKPI TFLGLMPP LH... EGRR. EDGEDATVRWLD                                          | 268 |
| UGT91D2   | PTKVCKWRKHLARLVK. YKAPGI SDGYRMLV LKGS DCLLSKCYHEFGTQWLP LLET LH... QVPVVPVGLL PPEI P... GDEKDET VVSI KKWLD                                      | 270 |
| UGT73P12  | PHEVENTRQLQPDWLRGAPNEYTYLAKMI KDSERKS YGSLFNSYELGTYEEHYKKAAGTKS WS VGPVSLWNQDASDKACRGGVKEKGGDGVLLTWLD                                            | 286 |
| Ole_D     | VAEPPWREPRQTE... RGRAYARFEAWLKENGIT EHPDTFASHP PRSLVLI PKALQP. HADR VDE D VYTFV G... ACCGDRAEEGGQR                                               | 227 |
| UGT91G16  | SHNDWMKTYTVES.P... ASGVS I AERCAI TLKACKLAALRSCL EWPDAVPLVKTHIQ. SGT P V V T L G L L P P P P P... SADTRGKDDDDATVRWLD                             | 246 |
| HV1       | SFETERRKLVTTQN... ASGMTVAERYFLTL MRS DLVAI RS CAWEPESVAAL T T L A... GKP V V P L G L L P P S P... EGGRGVS KEDA VRWLD                             | 265 |
| Pn3-31    | DNSNI TPEPPSAD... KMLHDFVACFKRS CDI I L I K S F R E L E G K Y I D L S T L S... K K T L V P V G L V Q D P... L G H D E P K T G H I N W L D        | 251 |
| Pn3-32    | DNSNI TPEPPSAD... NKMLHDFI AC FERS CDI I L I K S F R E L E G K Y I D L S T L S... D K T L V P V G L V Q D P... M G H N E D P K T E Q I I N W L D | 247 |
| Consensus | ... w                                                                                                                                            |     |
| MS1       | KKEPSS TVVFSFCSYFPSKEMEELAHGLE. ASEVNF I WVVRFPQDNTSG. I EDALPKGFLERAGE. RGVVKGWAPQAKI KHVSTGGFVSLGCMN                                           | 354 |
| MS2       | AQPAKS VVYVALCSYVPLGVEKVFELALGLE. LAGTRFLMALRKP TGVS... DADLLPAGFEERTRG. RGVVATRVVQVSI AHAAGVAF LTHCGMN                                          | 361 |
| UGT91D2   | GKQKGS VVYVALCSYVPLGVEKVFELALGLE. LSGPLFVMA YRKP TGPAK. SDSVELPDGFVTRTRD. RGLVWTSWAPQLRI SHESVCGFLTHCGSG                                         | 365 |
| UGT73P12  | SKTEDSVLYVFSYVNFKNFKPTQVFI AHALE. DSGHDFI WYVGI EGE GGG... ADELREFEKKVKEKNGYLI VGVAPQLLI I EHPAVGAVTTCGMN                                        | 381 |
| Ole_D     | PAGAEKVVYVALCSYVPLGVEKVFELALGLE. LSGTRFLWALRRPDAADADADDVLP GFEEERTRG. RGLVVFVGVVQVSI LAHGAVAAFLTHCGMS                                            | 343 |
| UGT91G16  | AQPAKS VVYVALCSYVPLRAEQVHVALGLE. LSGARFLWALRKP TDAP... DAADVLP GFEEERTRG. RGLVVTGVPQI GVLAHGAVAAFLTHCGMN                                         | 358 |
| HV1       | KRAESTVVFVCSYFPSNEELVVALGLE. I SVVNF I LAVRFL EGEKGG... VLPEGFVORVGD. RGLVVEGVVAPQARI GHSS TGGFVSLTHCGMS                                         | 343 |
| Pn3-31    | KRAESTVVFVCSYFPSNEELVVALGLE. I SVVNF I LAVRFL EGEKGG... VLPEGFVORVGD. RGLVVEGVVAPQARI GHSS TGGFVSLTHCGMS                                         | 343 |
| Pn3-32    | KRAESTVVFVCSYFPSNEELVVALGLE. I SVVNF I WVRVLI EGEKGG... VLPEGFVORVGD. RGLVVEGVVAPQARI GHSS TGGFVSLTHCGMS                                         | 339 |
| Consensus | ... g s c w p q i h g                                                                                                                            |     |
| MS1       | SVMSVMFGVPI I GVPVH. VDQFNAGLVEEAGVGVAEKRDP... DGKI QRDEVAKLI KEVVVEKTR. EDVRKKARENSEI LRSKGEK... 438                                            |     |
| MS2       | STIEGLMFGVPI I MLP I F. GDQGP NARLI EAKNAGLQVARNDG... DGSFDREGVAAAI RAVAVEEESKVFAKAKLQEI VADVACHERY... 449                                       |     |
| UGT91D2   | SIIEGLMFGVPI I MLP I F. GDQPLNARLLEDKCVGI EI PRNEE... DGCLTKESVARSLSVVEKEG. EI YKANARELSKI YNDTKVEKEY... 452                                     |     |
| UGT73P12  | TVMSVNASLPLATVPLFAEYFQFNEKLVVDVVKI GVPVGVKEWRNNE... FGDVVKRREI GKAI AFLVGGDESELEVRKRVKLSGATKKAIVQDGSY... 407                                     |     |
| Ole_D     | GSQGLATATPM AVPQA. VDQFGNADMLQGLGVARKLATEEATADLLRETALALVDDPEVARRLRRI QAEMAOEGGT RRAADLI EAETPARHERQEP... 479                                     |     |
| UGT91G16  | STIEGLRFGVPI I VMLP I ATGDQWP NARLMEERGVL RVP R DGN... DGSFHREGLAATVRAVTA DQGG... TFAANAGKLVVADRECHERC... 430                                    |     |
| HV1       | STIEGLLFGVPI I MLP I S. SDQGP NARLMEGRKVGWQVRDES... DGSFRREDVAATVRAVVEEDGRRVFTANAKM QEI VADGACHERC... 446                                        |     |
| Pn3-31    | SIIEGSMKFGVPI I AVARH. LDQPLNAKLA AEVGVGMEVVRDE... NGKYKREAI AEVI RAVVMEKNG. EVI RRRARELSSEKVKETGQE... 427                                       |     |
| Pn3-32    | SIIEGSMKFGVPI I AVARH. LDQPLNAKLA AEVGVGMEVVRDE... NGKYKREAI AEVI RAVVMEKSG. EVI RRRARELSSEKMKKEGQE... 423                                       |     |
| Consensus | ... e p                                                                                                                                          |     |
| MS1       | ... FDENVAEI SLLLKI... 452                                                                                                                       |     |
| MS2       | ... I DGF I QQLRSYKD... 462                                                                                                                      |     |
| UGT91D2   | ... VSQFVDYLEKNARAVAI DHES... 473                                                                                                                |     |
| UGT73P12  | TKLKELI EELKSI KLQKVNNKLMEAV... 505                                                                                                              |     |
| Ole_D     | ... VGD RPNVGD RPA G VRS DRQRSAL... 430                                                                                                          |     |
| UGT91G16  | ... I DGF I QQLTSYMD... 443                                                                                                                      |     |
| HV1       | ... I DGF I QQLRSYKA... 459                                                                                                                      |     |
| Pn3-31    | ... I GRAVEELVQI CKMKKDAQY... 447                                                                                                                |     |
| Pn3-32    | ... I DRAVEELVQI CKMKKDAQ... 442                                                                                                                 |     |
| Consensus |                                                                                                                                                  |     |

114

115 **Figure S6.** Multiple sequence alignment of 9 UGTs that show branched glycosylation  
116 activity to triterpenes. **Related to Figure 4.** The following UGTs were used in this  
117 analysis: MS1, MS2 (GenBank: XP\_015629141), UGT91D2 (GenBank: ACE87855.1),  
118 UGT73P12 (GenBank: BBN60799.1), OleD (GenBank: ABA42119.2), UGT91G16  
119 (GenBank: QHG10987.1), HV1 (GenBank: BAJ98242.1), Pn3-31 (GenBank:  
120 QOJ43868.1) and Pn3-32 (GenBank: QOJ43866.1).

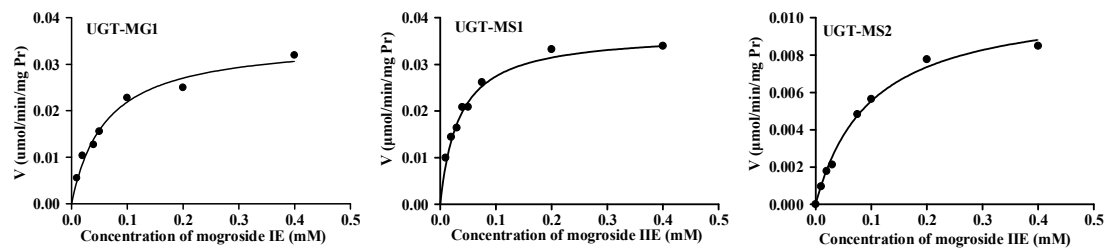

121

122 **Figure S7.** Determination of kinetic parameters for recombinant glycosyltransferase

123 MG1 (on IE) and MS1 and MS2 (on mogroside IIE). **Related to Table 1.** The catalytic

124 constants were obtained using GraphPad Prism 5 software.

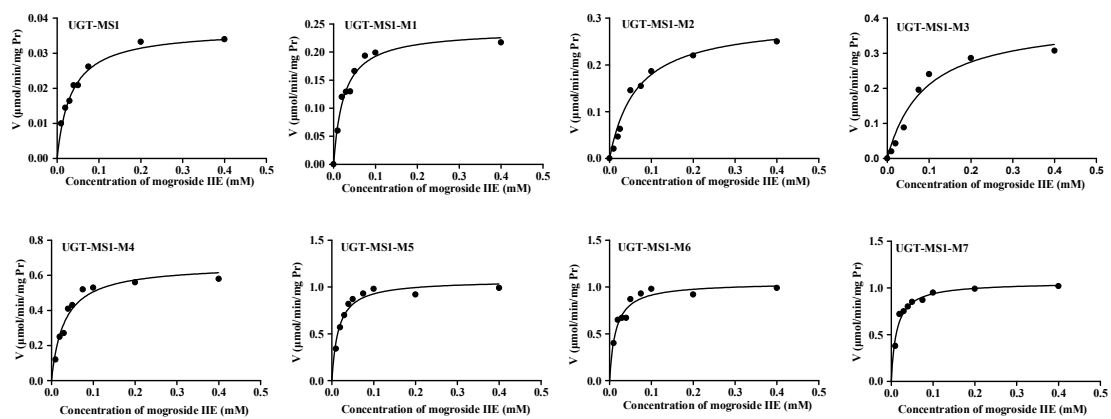

125

126

127

**Figure S8.** Determination of kinetic parameters for recombinant glycosyltransferase MS1, and its mutants on mogroside IIE. **Related to Table 1.**

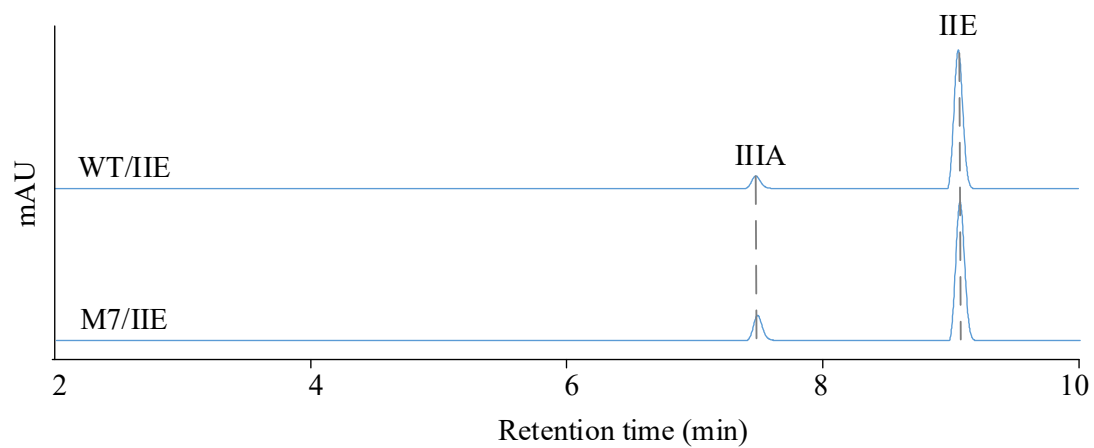

128

129 **Figure S9.** HPLC analysis of MS1 WT and mutant M7 enzymatic reaction products  
130 using mogroside IIE as substrate. **Related to Figure 5.**

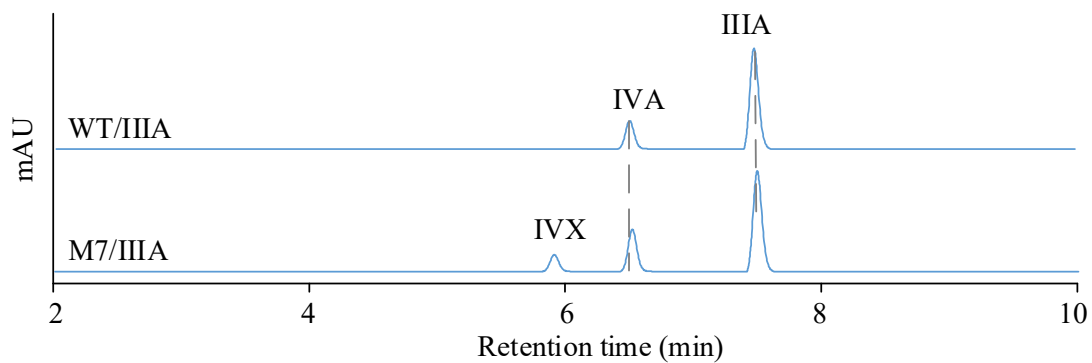

131

132 **Figure S10.** HPLC analysis of MS1 WT and mutant M7 enzymatic reaction products  
133 using mogroside IIIA as substrate. **Related to Figure 5.**



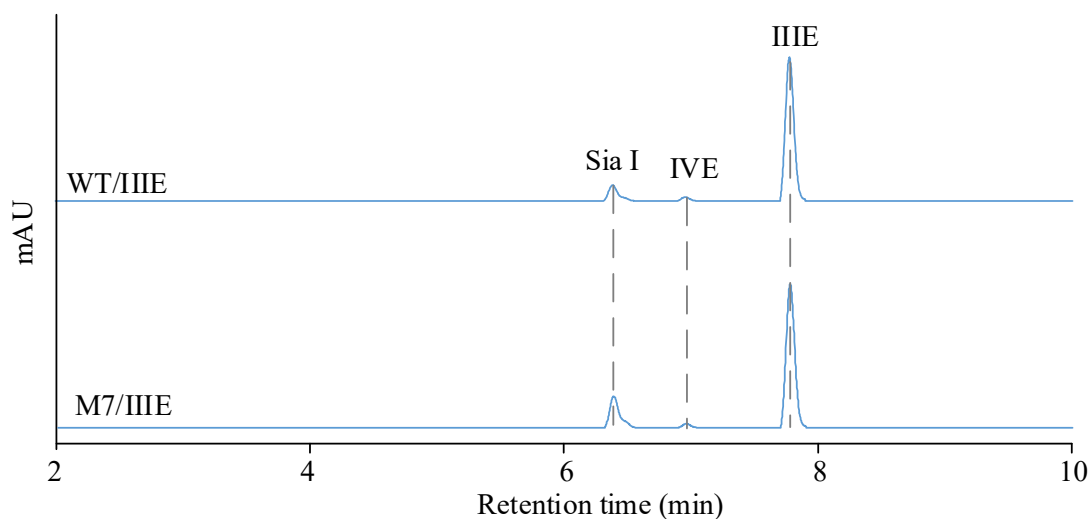

134

135 **Figure S11.** HPLC analysis of MS1 WT and mutant M7 enzymatic reaction products

136 using mogroside III E as substrate. **Related to Figure 5.**

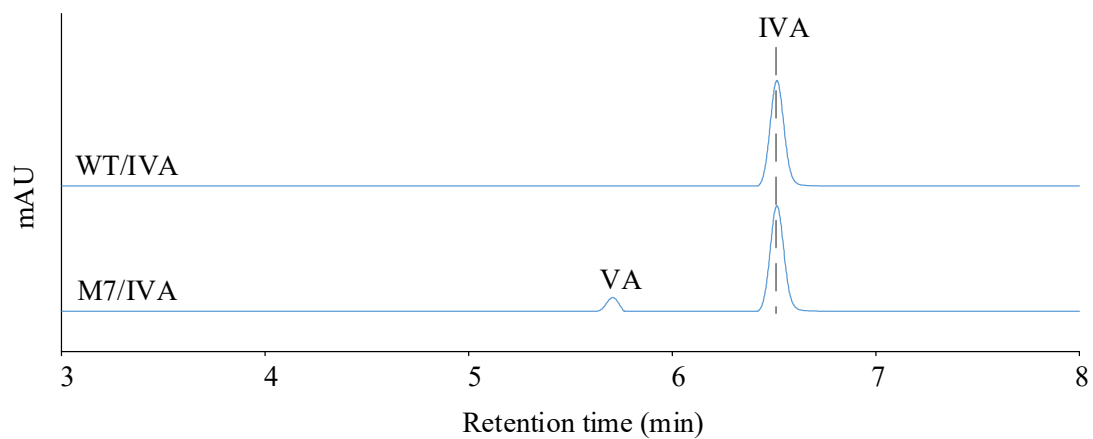

137

138 **Figure S12.** HPLC analysis of MS1 WT and mutant M7 enzymatic reaction products

139 using mogroside IVA as substrate. **Related to Figure 5.**

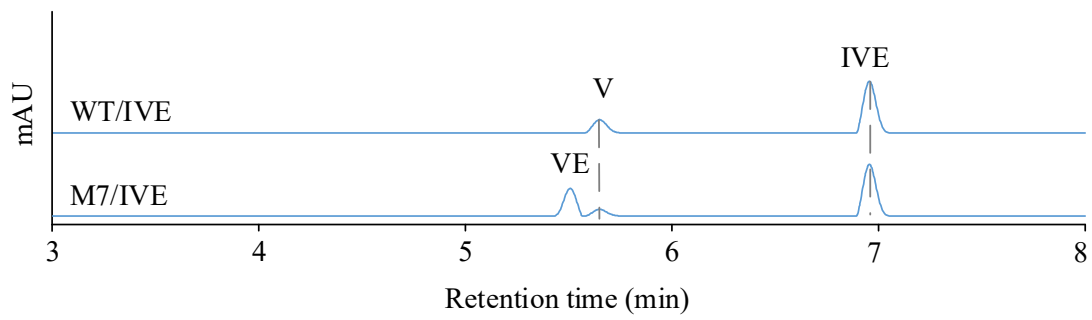

140

141 **Figure S13.** HPLC analysis of MS1 WT and mutant M7 enzymatic reaction products

142 using mogroside IVE as substrate. **Related to Figure 5.**

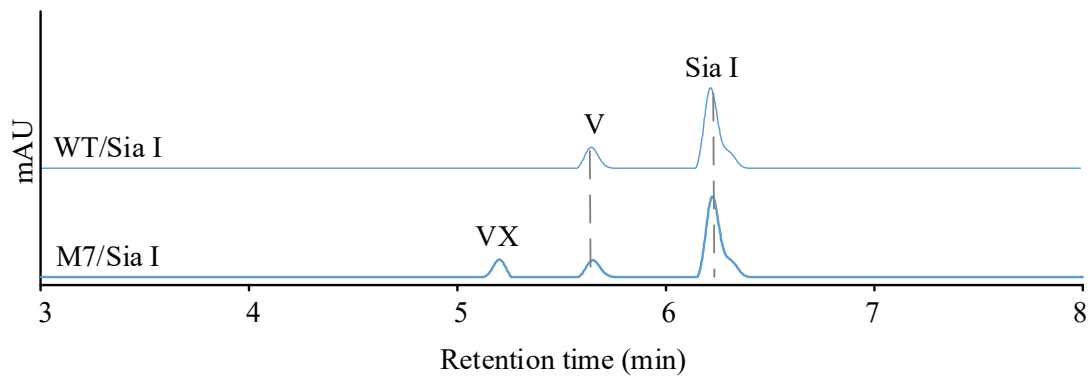

143

144 **Figure S14.** HPLC analysis of MS1 WT and mutant M7 enzymatic reaction products  
145 using mogroside Sia I as substrate. **Related to Figure 5.**

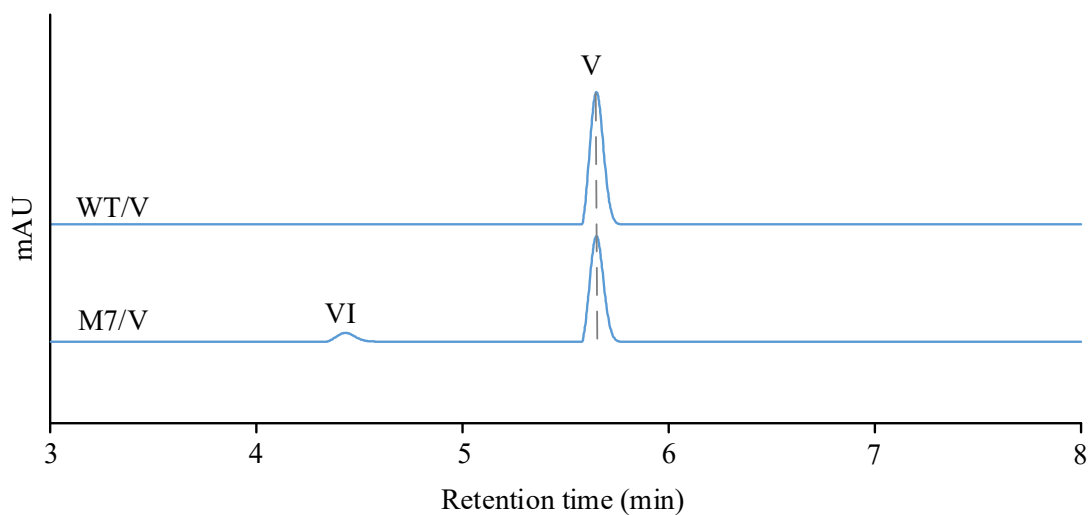

146

147 **Figure S15.** HPLC analysis of MS1 WT and mutant M7 enzymatic reaction products

148 using mogroside V as substrate. **Related to Figure 5.**

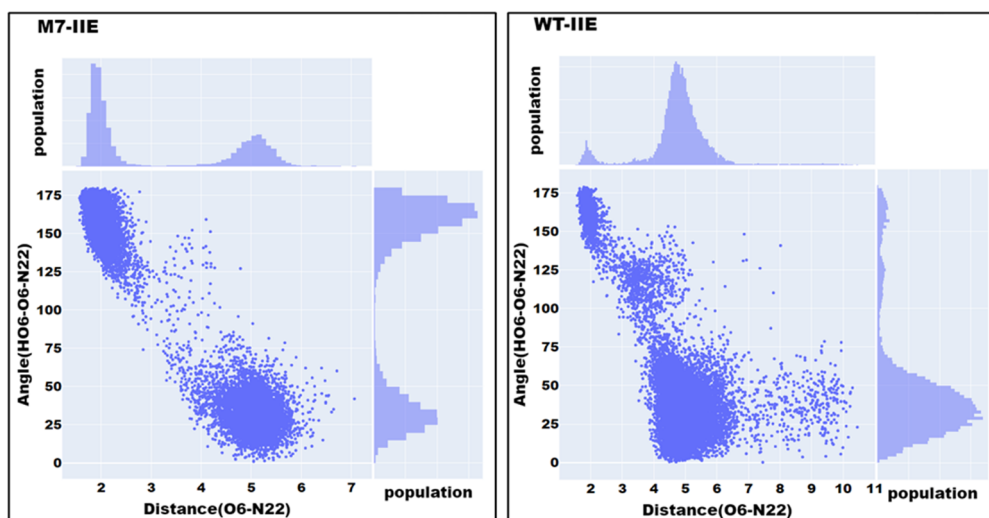

149

150

151 **Figure S16.** Conformation maps of M7-IIE and WT-IIE complexes during the 3\*50 ns  
 152 MD simulations. Related to Figure 6. According to reaction mechanism, a catalytic  
 153 conformation, which supports catalysis, occurs when the distance between the O<sub>6</sub> atom  
 154 of C24-sugar and the N<sub>22</sub> nitrogen of the catalytic residue His22 is less than 3.6 Å and  
 155 the angle of H<sub>o6</sub>-O<sub>6</sub>-N<sub>22</sub> is larger than 135°

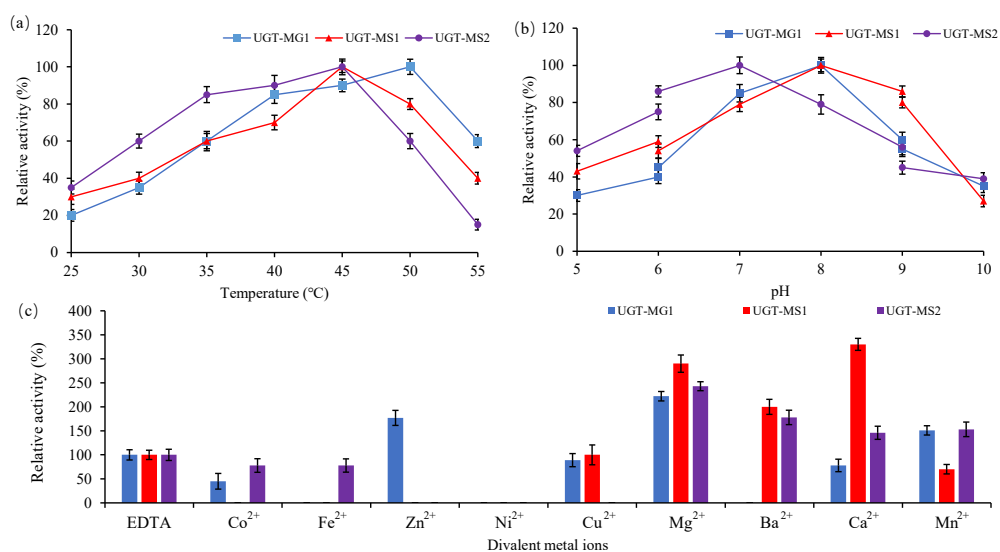

156

157 **Figure S17.** Optimization of reaction temperature, pH and divalent metal ions of MS1  
 158 and MS2. **Related to Figure 7.** (a) Relative activity of MS1 and MS2 at various  
 159 temperatures (25–60°C) at pH 8.0. (b) Relative activity of MS1 and MS2 at different  
 160 pH conditions (pH 5.0–10.0). (c) Relative activity of MS1 and MS2 with divalent metal  
 161 ions.

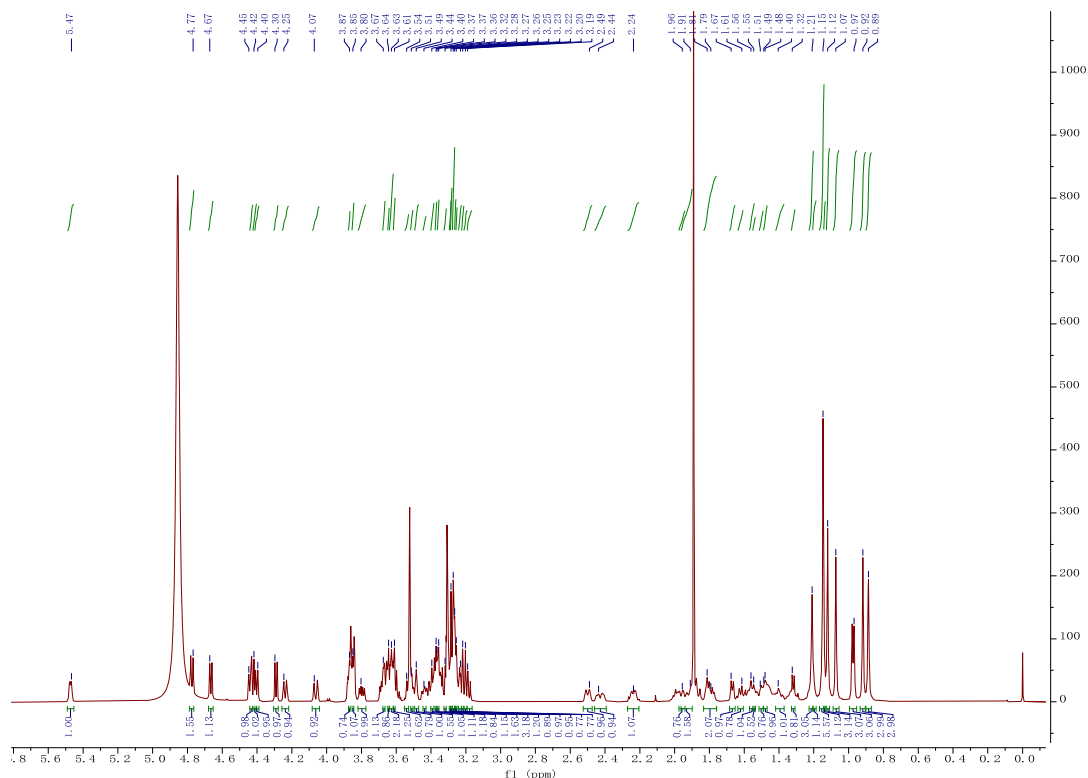

162

163 **Figure S18.**  $^1\text{H}$  NMR spectrum of VI in Dimethyl sulfoxide- $d_6$  (600 MHz). **Related**  
 164 **to Figure 5.** Glycosides VI was purified by an Agilent 1260 preparative HPLC system  
 165 with semi-preparative C18 reverse-phase column ( $21.2 \times 250$  mm,  $5 \mu\text{m}$  particles, Welch,  
 166 Shanghai, China). The fractions with the same mogroside glucoside were collected and  
 167 concentrated on rotary evaporator. The purified product was dissolved in deuterated  
 168 methanol, after vacuum freeze drying. 1D NMR and 2D NMR spectroscopies of the product,  
 169 including  $^1\text{H}$  NMR,  $^{13}\text{C}$  NMR, correlation spectroscopy (COSY), total correlation  
 170 spectroscopy (TOCSY), heteronuclear single quantum coherence (HSQC), and heteronuclear  
 171 multiple bond correlation (HMBC), were recorded on an Advance DMX-600 NMR  
 172 spectrometer (Bruker, Karlsruhe, Germany), to identify the chemical structure of the  
 173 compound.



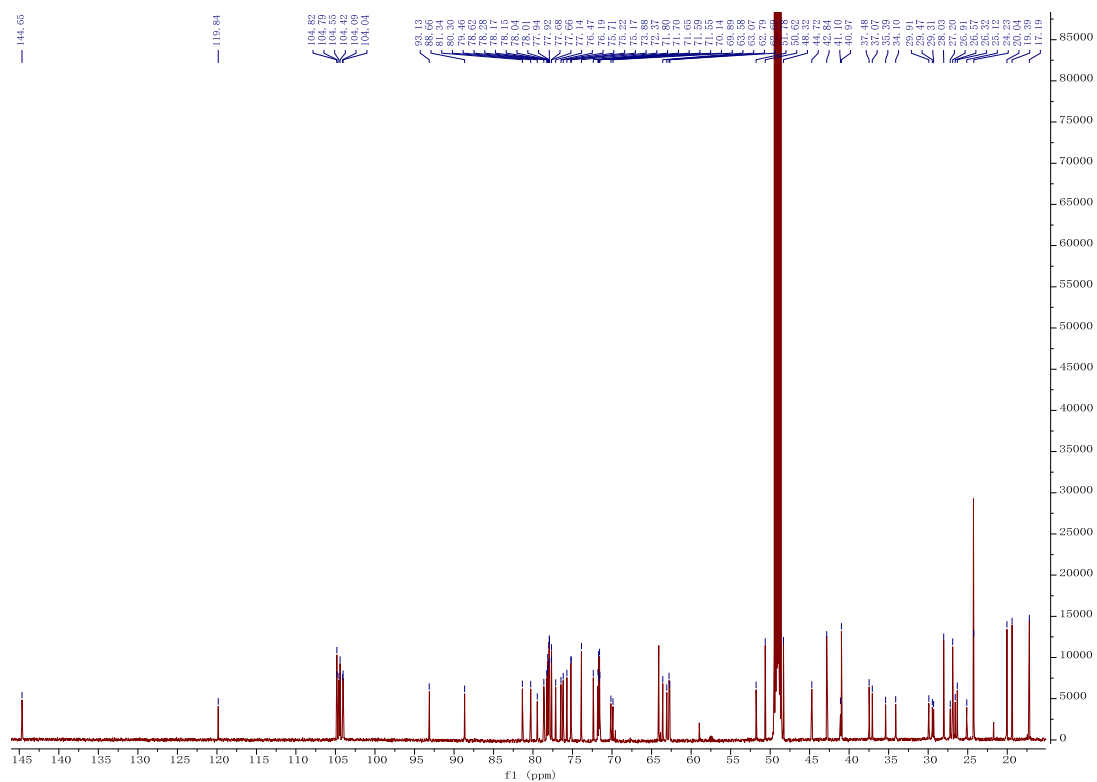

174

175 **Figure S19.**  $^{13}\text{C}$  NMR spectrum of VI in Dimethyl sulfoxide- $d_6$  (600 MHz). **Related**  
 176 **to Figure 5.**

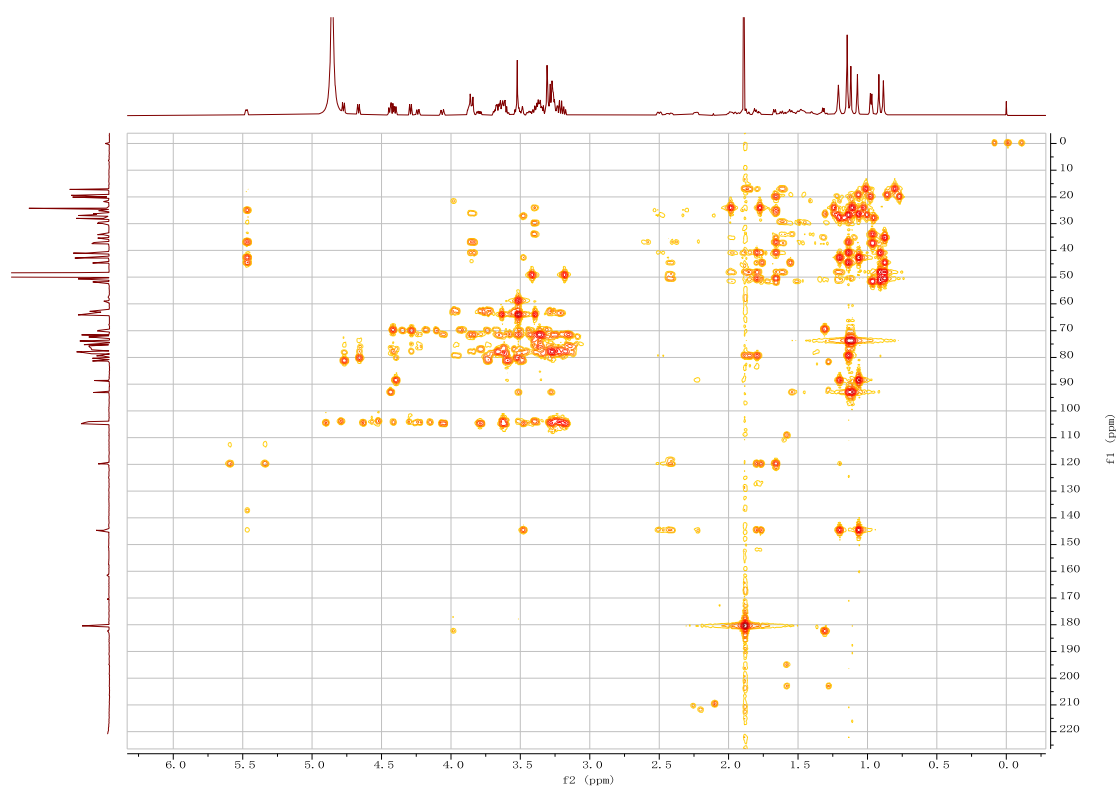

177

178 **Figure S20.** HMBC spectrum of VI in Dimethyl sulfoxide-d6 (600 MHz). Related to

179 **Figure 5.**

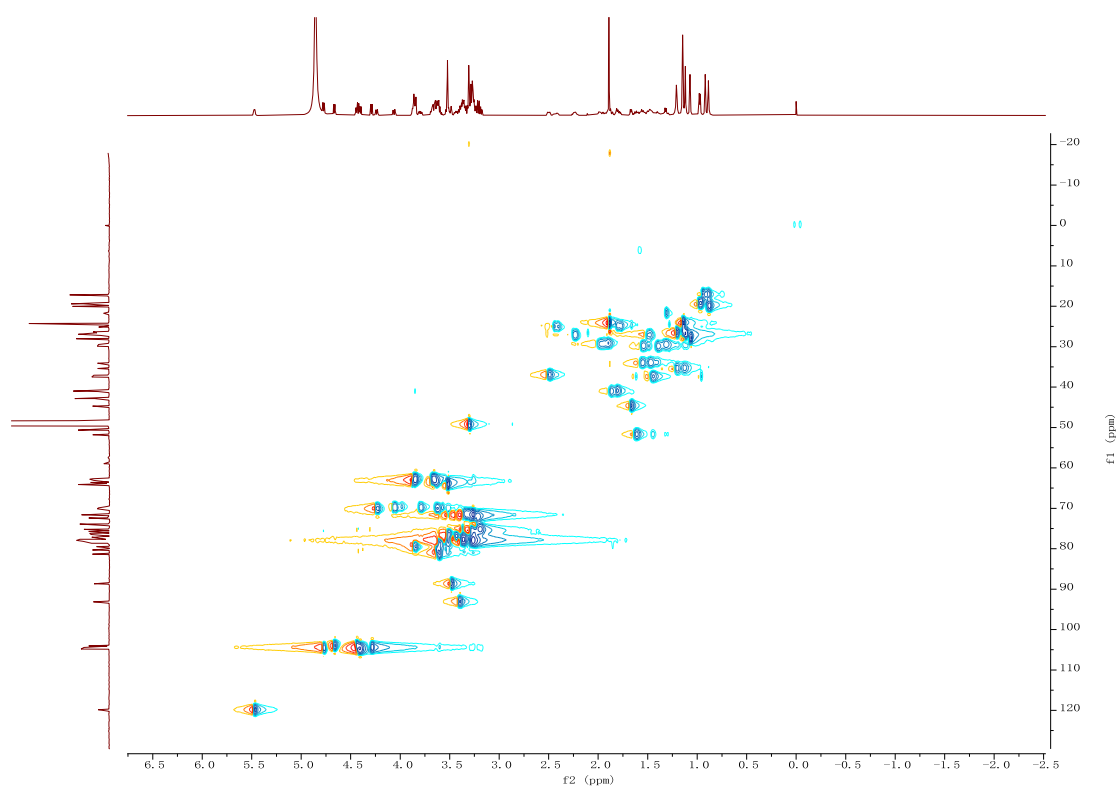

180

181 **Figure S21.** HSQC spectrum of VI in Dimethyl sulfoxide-d<sub>6</sub> (600 MHz). Related to

182 **Figure 5.**

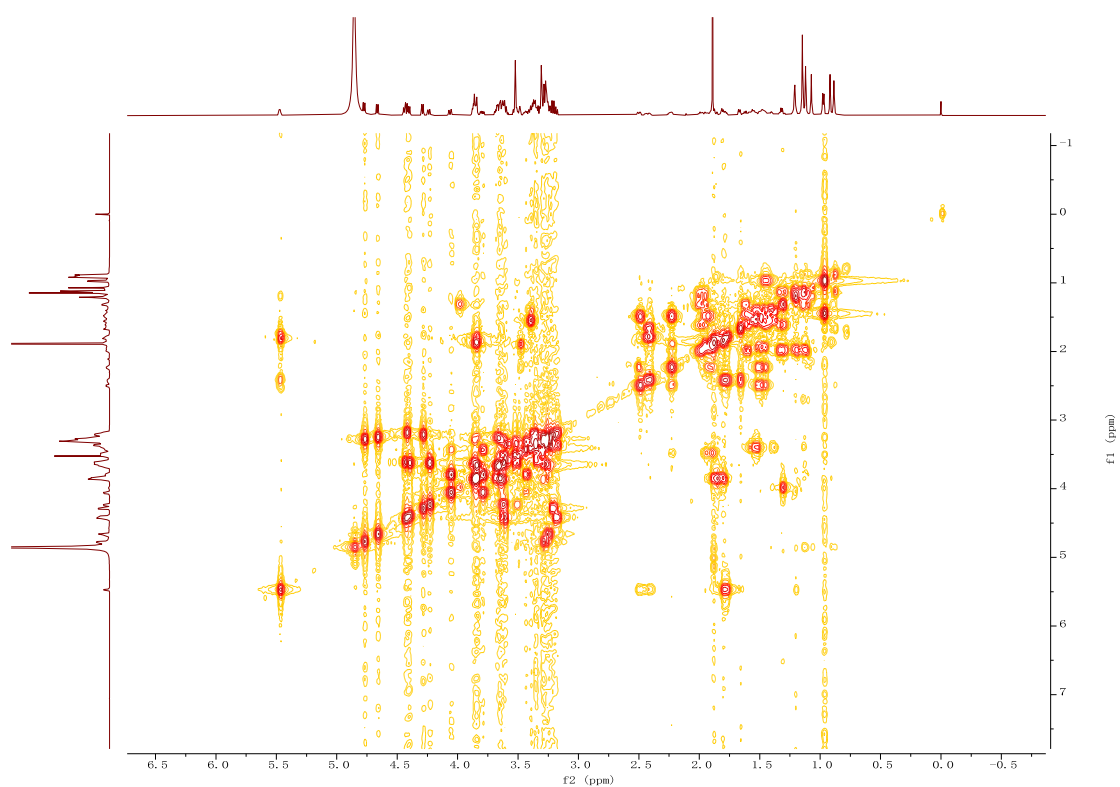

183

184 **Figure S22.** COSY spectrum of VI in Dimethyl sulfoxide-d<sub>6</sub> (600 MHz). Related to

185 **Figure 5.**

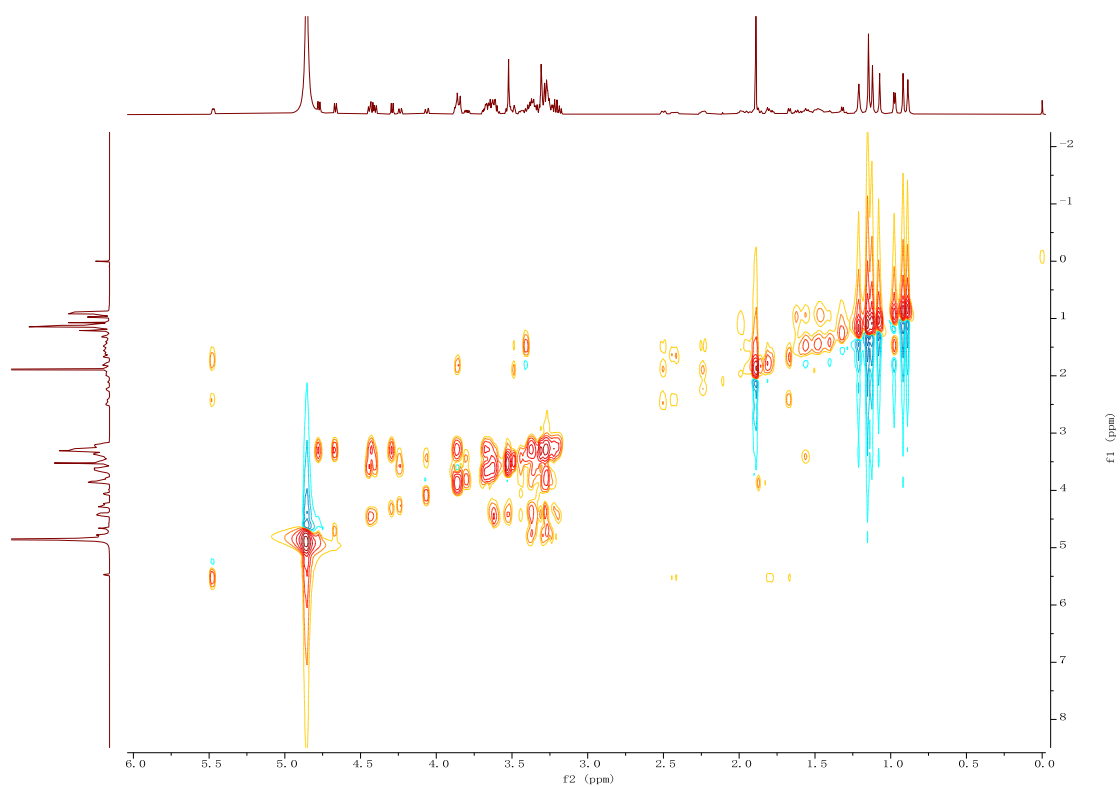

186

187 **Figure S23.** TOCSY spectrum of VI in Dimethyl sulfoxide-d6 (600 MHz). **Related to**

188 **Figure 5.**

```

>MG1
GGATCCATGGAAAAGGGTGACACTCACATCTTGGTTTTCCCATCCAGCTCAAGGTCACATTAACCCATTGTTGCAATTGTCTAAGCAC
TTGATCGCTAAGGGTATTAAGGTTTCTTTGGTCACTACCTTGCACGCTCTAACAGAATGCAATTGCAAGGTGCTTACTCTAACTCTGTT
AAGATCGAAGTCATTTCTGACGGTCTGAAGACAGATTGGAACACTGACACCTTGAGACAATACTGGACAGATTGACAAAAAGATGACC
AAGAACTTGGAAAGACTTCTTGCAAAAAGGCTATGGTTTTCTTAACCCACAAAGTTCATCATCTACGACTCTACTATGCCATGGGTTTTG
GAAGTCGCTAAGGAATTCGGTTTTGGACAGAGCTCCATTCTACACCCAATCTTGTGCTTTGAACCTATCAACTACCACGTTTTGCACGGT
CAATTGAAGTTGCCACCAGAACTCCAACCATTTCTTTGCCATCTATGCCATTGTTAAGACCATCTGACTTGGCAGCTTACGACTTCGCAC
CCAGCTTCTACTGACACCATCATTGACTTGTGACTTCTCAATACTCTAACATCCAAGACGCTAACTTGTGTTCTGTAACACTTTGCAC
AAGTTGGAAGGTGAAATCATTCAATGGATGGAACCTTGGGTAGACCAAGTTAAGACTGTCGGTCCAACCGTCCATCTGCTTACTTGGAC
AAGAGAGTCGAAAACGACAAGCACTACGGTTTGTCTTTGTTCAAGCCAAACGAAGACGTTTGTGTAAGTGGTTGGACTTAAGCCATCT
GGTCTGTTTTGTACGCTCTTACGGTCTTTGGTCAAATGGGTGAAGAACAATTGAAGGAATTGGCTTTGGGTATTAAGGAAACTGGT
AAATCTTCTGTGGGTTGTGACAGACACCGAAGCTGAAAAGTTGCCACCAAACTTCGTTGAATCTGTCGCTGAAAAGGGTTTTGGTTGTC
TCTTGGTGTCTCAATTGGAAGTTTTGGCTCACCCATCTGTCGGTTGTTTCTCACTACTGTGGTTGGAACCTACCTTGGAAAGCTTTG
TGTTTTGGGTGTTCCAGTTGTCGCTTTCCCAATGGGCTGACCAAGTCACTAACGCTAAGTCTTGGAAAGACGTTTGGAAAGTCGGTAAA
AGAGTTAAGAGAAACGAACAAAGATTGGCTTCTAAGGAAGAAGTTAGATCTTGTATCTGGGAAGTCATGGAAGGTGAAAAGAGCTTCTGAA
TTCAAGTCTAACTCTATGGAATGGAAGAAGTGGGCTAAGGAAGCTGTTGACGAAGGTGGTCTTCTGACAAGAACATTGAAGAATTCGTC
GCTATGTTGAAGCAAACtaaCTCGAG
>MS1
GGATCCATGGACGCTGCTCAACAAGGTGACACTACCCTATTTGATGTTGCCATGGTTGGGTTACGGTCACTGTCTGCTTTCTTGAA
TTGGCTAAGTCTTTGTCTAGAAAGAACTTCCACATCTACTTCTGTCTACCTCTGTTAACTTGGACGCTATTAAGCCAAAGTTGCCATCT
TCTTTCTCTGACTCTATCCAATTCGTCGAATTGCACCTTGGCATCTTCTCCAGAATTGCCACCACACTTGCACACCCTAACGGTTTTGCCA
CCAACTTGTATGCCAGCTTTGCACCAAGCTTTCTCTATGGCTGCTCAACACTTCGAATCTATCTTGCAAACTTTGGCTCCACACTTGTG
ATCTACGACTCTTTGCAACCATGGGCTCCAAGAGTTGCTTCTTCTTGAAGATCCAGCTATTAACCTTCAACACCCTGGTGTCTTCGTT
ATCTCTCAAGGTTTGACCCCAATTACTACCCACACTCTAAGTTCCTTCTGCAATTCGTTGCAACAACCCTGGAAGGCTATGTAC
TCTACCGCTGACGGTGCTTCTACCGAAAGAAGTGAAGAAGAGAGGTGAAGCTTTCTTGTACTGTTTGCACGCTTCTTGTCTGTTATCTTG
ATTAACCTTTTCAAGAAATTGGAAGGTAAATACATGGACTACTTGTCTGTTGTTGAACAAGAAGGTTGTCACGCTGGTCCATTGGTT
TACGAACCAACCAAGACGGTGAAGACGAAGGTTACTTCTTATTAAGAAGTGGTTGGACAAGAAGGAACCATCTTCTACTGTCTTCGTT
TCTTTCCGTTCTGAATACTTCCCATCTAAGGAAGAAATGGAAGAAATGCTCACGGTTTGGAAAGCTTCTGAAGTAACTTCAITCGGGT
GTCAGATTTCCACAAGGTGACAACCTCTGGTATTGAAGACGCTTTGCCAAAAGGGTTTCTTGGAAAGAGCTGGTGAAAAGAGGTATGGTT
GTCAAGGGTTGGGCTCCACAAGCTAAGATCTTGAAGCACTGGTCTACTGGTGGTTTCGCTCTCACTGTGGTTGAACTCTGTTATGGAA
TCTATGATGTTCCGTGTCCCAATCATTGGTGTCCCAATGCAGGTTGACCAACCATTCAACGCTGGTTTGGTTGAAGAAGCTGGTGTCCGT
GTTGAAGCTAAGAGAGATCCAGACGGTAAAATCCAAAGAGACGAAGTTGCTAAGTTGATTAAGGAAGTTGTCGTTGAAAAGACTAGAGAA
GACGTCAGAAAAGAAGGCTAGAGAAATGCTGAAATCTTGAGATCTAAGGGTGAAGAAAAGTTTCGACGAATGGTTGCTGAAATCTCTTTG
TTGTTGAAGATTtaaCTCGAG

```

189

190 **Figure S24.** The gene sequences of MG1 and MS1, which were synthesized by  
 191 GenScript (Nanjing, China) with codon optimization according to *S. cerevisiae*. **Related**  
 192 **to Figures 1 and 2.**

193
